# Supplementary material for: Is Telemedicine in Primary Care a Good Option for Polish Patients with Visual Impairments Outside of a Pandemic?
Source: MDPI journal article supplement (doi:10.3390/ijerph19116357), 2022-05-24
Supplement: s1 [file s1]

**Table S1:** Frequency of the PCP's services utilization in the past six months.

|                                      | Never |      | Once |      | Two times |      | 3-5 times |      | ≥6 |      | Total |      |
|--------------------------------------|-------|------|------|------|-----------|------|-----------|------|----|------|-------|------|
|                                      | N     | %    | N    | %    | N         | %    | N         | %    | N  | %    | N     | %    |
| <b>Level of visual impairment</b>    |       |      |      |      |           |      |           |      |    |      |       |      |
| The poor-sightedness                 | 22    | 14.4 | 15   | 9.8  | 39        | 25.5 | 52        | 34.0 | 25 | 16.3 | 153   | 71.2 |
| The blindness                        | 17    | 27.5 | 9    | 14.5 | 15        | 24.2 | 12        | 19.4 | 9  | 14.5 | 62    | 28.8 |
| <b>Sex in the poor-sighted group</b> |       |      |      |      |           |      |           |      |    |      |       |      |
| Poor-sighted women                   | 12    | 12.4 | 12   | 12.4 | 21        | 21.6 | 33        | 34.0 | 19 | 19.6 | 97    | 63.4 |
| Poor-sighted men                     | 10    | 17.9 | 3    | 5.4  | 18        | 32.1 | 19        | 33.9 | 6  | 10.7 | 56    | 36.6 |
| <b>Sex in the blind group</b>        |       |      |      |      |           |      |           |      |    |      |       |      |
| Blind women                          | 8     | 29.7 | 3    | 11.1 | 7         | 25.9 | 6         | 22.2 | 3  | 11.1 | 27    | 43.5 |
| Blind men                            | 9     | 25.8 | 6    | 17.1 | 8         | 22.9 | 6         | 17.1 | 6  | 17.1 | 35    | 56.5 |
| <b>Additional disability</b>         |       |      |      |      |           |      |           |      |    |      |       |      |
| Yes                                  | 12    | 14.1 | 9    | 10.6 | 18        | 21.2 | 27        | 31.8 | 19 | 22.4 | 85    | 39.5 |
| No                                   | 27    | 20.8 | 15   | 11.5 | 36        | 27.7 | 37        | 28.5 | 15 | 11.5 | 130   | 60.5 |
| <b>Chronic disease<sup>1</sup></b>   |       |      |      |      |           |      |           |      |    |      |       |      |
| Yes                                  | 18    | 13.2 | 13   | 9.6  | 29        | 21.3 | 48        | 35.3 | 28 | 20.6 | 136   | 63.3 |
| No                                   | 21    | 26.6 | 11   | 13.9 | 25        | 31.7 | 16        | 20.2 | 6  | 7.6  | 79    | 36.7 |

<sup>1</sup> chi<sup>2</sup>=17.013; p=0.002.

**Table S2:** The utilization of the computer and Internet by the study participants in percentages.

|                                       | Computer using |      |    |                   | Internet using |       |    |                   |
|---------------------------------------|----------------|------|----|-------------------|----------------|-------|----|-------------------|
|                                       | Yes            |      | No |                   | Yes            |       | No |                   |
|                                       | N              | %    | N  | %                 | N              | %     | N  | %                 |
| <b>Level of visual impairment</b>     |                |      |    |                   |                |       |    |                   |
| The poor-sightedness                  | 125            | 80.1 | 31 | 19.9              | 132            | 84.6  | 24 | 15.4              |
| The blindness                         | 54             | 85.7 | 9  | 14.3              | 57             | 90.5  | 6  | 9.5               |
| Total                                 | 189            | 86.3 | 30 | 13.7              | 189            | 86.3  | 6  | 9.5               |
| <b>Sex in the poor-sighted group</b>  |                |      |    |                   |                |       |    |                   |
| Women                                 | 75             | 76.5 | 23 | 23.5              | 80             | 81.6  | 18 | 18.4              |
| Men                                   | 50             | 86.2 | 8  | 13.8              | 52             | 89.7  | 6  | 10.3              |
| <b>Sex in the blind group</b>         |                |      |    |                   |                |       |    |                   |
| Women                                 | 21             | 75.0 | 7  | 25.0              | 24             | 85.7  | 4  | 14.3              |
| Men                                   | 33             | 94.3 | 2  | 5.7 <sup>1</sup>  | 33             | 94.3  | 2  | 5.7               |
| <b>Age</b>                            |                |      |    |                   |                |       |    |                   |
| 18-39 years                           | 66             | 97.1 | 2  | 2.9               | 68             | 100.0 | -  | -                 |
| 40-59 years                           | 66             | 93.4 | 7  | 9.6               | 71             | 97.3  | 2  | 2.7               |
| 60 and more                           | 45             | 59.2 | 31 | 40.8 <sup>2</sup> | 48             | 63.2  | 28 | 36.8 <sup>5</sup> |
| <b>Level of education</b>             |                |      |    |                   |                |       |    |                   |
| Primary education                     | 21             | 56.8 | 16 | 43.2              | 21             | 56.8  | 16 | 43.2              |
| Secondary education                   | 81             | 82.6 | 17 | 17.4              | 87             | 88.8  | 11 | 11.2              |
| Higher education                      | 77             | 91.7 | 7  | 8.3 <sup>3</sup>  | 81             | 96.4  | 3  | 3.6 <sup>6</sup>  |
| <b>Place of residence</b>             |                |      |    |                   |                |       |    |                   |
| Rural                                 | 30             | 96.8 | 1  | 3.2               | 31             | 100.0 | -  | -                 |
| Urban to 50 k inhabitants             | 38             | 84.4 | 7  | 15.6              | 41             | 91.1  | 4  | 8.9               |
| Urban from 50 k to 100 k inhabitants  | 21             | 87.5 | 3  | 12.5              | 23             | 95.8  | 1  | 4.2               |
| Urban from 100 k to 500 k inhabitants | 37             | 80.4 | 9  | 19.6              | 38             | 82.6  | 8  | 17.4              |
| Urban over 500 k inhabitants          | 53             | 72.6 | 20 | 27.4 <sup>4</sup> | 56             | 76.7  | 17 | 23.3 <sup>7</sup> |

<sup>1</sup>chi<sup>2</sup>=4.725; p=0.030; <sup>2</sup>chi<sup>2</sup>=39.916; p=0.000; <sup>3</sup>chi<sup>2</sup>=21.069; p=0.000; <sup>4</sup>chi<sup>2</sup>=9.582; p=0.048;

<sup>5</sup>chi<sup>2</sup>=52.235; p=0.000; <sup>6</sup>chi<sup>2</sup>=35.114; p=0.000; <sup>7</sup>chi<sup>2</sup>=13.854; p=0.008.

**Table S3:** The level of the computer skills among the study group.

|                                       | <b>Lack</b> |      | <b>Low</b> |      | <b>Average</b> |      | <b>High</b> |      |
|---------------------------------------|-------------|------|------------|------|----------------|------|-------------|------|
|                                       | N           | %    | N          | %    | N              | %    | N           | %    |
| <b>Level of visual impairment</b>     |             |      |            |      |                |      |             |      |
| The poor-sightedness                  | 23          | 14.7 | 15         | 9.6  | 65             | 41.7 | 53          | 34.0 |
| The blindness                         | 7           | 11.1 | 6          | 9.5  | 26             | 41.3 | 24          | 38.1 |
| Total                                 | 30          | 13.7 | 21         | 9.6  | 91             | 41.6 | 77          | 35.1 |
| <b>Sex in the poor-sighted group</b>  |             |      |            |      |                |      |             |      |
| Women                                 | 18          | 18.4 | 10         | 10.2 | 39             | 39.8 | 31          | 31.6 |
| Men                                   | 5           | 8.6  | 5          | 8.6  | 26             | 44.9 | 22          | 37.9 |
| <b>Sex in the blind group</b>         |             |      |            |      |                |      |             |      |
| Women                                 | 5           | 17.9 | 2          | 7.1  | 11             | 39.3 | 10          | 35.7 |
| Men                                   | 2           | 5.7  | 4          | 11.4 | 15             | 42.9 | 14          | 40.0 |
| <b>Age<sup>1</sup></b>                |             |      |            |      |                |      |             |      |
| 18-39 years                           | -           | -    | 4          | 5.9  | 26             | 38.2 | 38          | 55.9 |
| 40-59 years                           | 3           | 4.1  | 6          | 8.2  | 33             | 45.2 | 31          | 42.5 |
| 60 and more                           | 27          | 35.5 | 10         | 13.2 | 31             | 40.8 | 8           | 10.5 |
| <b>Level of education<sup>2</sup></b> |             |      |            |      |                |      |             |      |
| Primary education                     | 16          | 43.2 | 1          | 2.7  | 18             | 48.7 | 2           | 5.4  |
| Secondary education                   | 10          | 10.2 | 15         | 15.3 | 46             | 46.9 | 27          | 27.6 |
| Higher education                      | 4           | 4.8  | 5          | 6.0  | 27             | 32.1 | 48          | 57.1 |
| <b>Place of residence</b>             |             |      |            |      |                |      |             |      |
| Rural                                 | -           | -    | 4          | 12.9 | 14             | 45.2 | 13          | 41.9 |
| Urban to 50 k inhabitants             | 3           | 6.7  | 4          | 8.9  | 18             | 40.0 | 20          | 44.4 |
| Urban from 50 k to 100 k inhabitants  | 3           | 12.5 | 1          | 4.2  | 13             | 54.1 | 7           | 29.2 |
| Urban from 100 k to 500 k inhabitants | 6           | 13.0 | 5          | 10.9 | 21             | 45.7 | 14          | 30.4 |
| Urban over 500 k inhabitants          | 18          | 24.7 | 7          | 9.6  | 25             | 34.2 | 23          | 31.5 |

<sup>1</sup>chi<sup>2</sup>=65.198; p=0.000; <sup>2</sup>chi<sup>2</sup>=61.074; p=0.000.

**Table S4:** The level of the Internet skills among the study group.

|                                       | <b>Lack</b> |      | <b>Low</b> |      | <b>Average</b> |      | <b>High</b> |      |
|---------------------------------------|-------------|------|------------|------|----------------|------|-------------|------|
|                                       | N           | %    | N          | %    | N              | %    | N           | %    |
| <b>Level of visual impairment</b>     |             |      |            |      |                |      |             |      |
| The poor-sightedness                  | 23          | 14.7 | 7          | 4.5  | 62             | 39.8 | 64          | 41.0 |
| The blindness                         | 5           | 7.9  | 9          | 14.3 | 23             | 36.5 | 26          | 41.3 |
| Total                                 | 28          | 12.8 | 16         | 7.3  | 85             | 38.8 | 90          | 41.1 |
| <b>The poor-sighted group</b>         |             |      |            |      |                |      |             |      |
| Women                                 | 17          | 17.3 | 5          | 5.1  | 39             | 39.8 | 37          | 37.8 |
| Men                                   | 6           | 10.3 | 2          | 3.4  | 23             | 39.7 | 27          | 46.6 |
| <b>The blind group</b>                |             |      |            |      |                |      |             |      |
| Women                                 | 4           | 14.3 | 3          | 10.7 | 10             | 35.7 | 11          | 39.3 |
| Men                                   | 1           | 2.9  | 6          | 17.1 | 13             | 37.1 | 15          | 42.9 |
| <b>Age<sup>1</sup></b>                |             |      |            |      |                |      |             |      |
| 18-39 years                           | -           | -    | -          | -    | 20             | 29.4 | 48          | 70.6 |
| 40-59 years                           | 1           | 1.4  | 5          | 6.9  | 33             | 45.1 | 34          | 46.6 |
| 60 and more                           | 27          | 35.5 | 10         | 13.2 | 31             | 40.8 | 8           | 10.5 |
| <b>Level of education<sup>2</sup></b> |             |      |            |      |                |      |             |      |
| Primary education                     | 16          | 43.2 | 2          | 5.4  | 17             | 46.0 | 2           | 5.4  |
| Secondary education                   | 9           | 9.2  | 10         | 10.2 | 45             | 45.9 | 34          | 34.7 |
| Higher education                      | 3           | 3.6  | 4          | 4.8  | 23             | 24.4 | 53          | 64.2 |
| <b>Place of residence</b>             |             |      |            |      |                |      |             |      |
| Rural                                 | -           | -    | -          | -    | 15             | 48.4 | 16          | 51.6 |
| Urban to 50 k inhabitants             | 3           | 6.7  | 2          | 4.4  | 16             | 35.6 | 24          | 53.4 |
| Urban from 50 k to 100 k inhabitants  | 1           | 4.2  | 4          | 16.7 | 9              | 37.5 | 10          | 41.6 |
| Urban from 100 k to 500 k inhabitants | 7           | 15.2 | 5          | 10.9 | 19             | 41.3 | 15          | 32.6 |
| Urban over 500 k inhabitants          | 17          | 23.3 | 5          | 6.8  | 26             | 35.6 | 25          | 34.3 |

<sup>1</sup>chi<sup>2</sup>=89.740; p=0.000; <sup>2</sup>chi<sup>2</sup>=63.498; p=0.000; <sup>3</sup> chi<sup>2</sup>=24.901; p=0.015.

**Table S5:** Representative quotes for the needs of PVIIs using TCs.

|                                                               |                                                                                                                                                                                                                                                                                                                                                                                                                                                                                                                                                                                                                                                                                                  |
|---------------------------------------------------------------|--------------------------------------------------------------------------------------------------------------------------------------------------------------------------------------------------------------------------------------------------------------------------------------------------------------------------------------------------------------------------------------------------------------------------------------------------------------------------------------------------------------------------------------------------------------------------------------------------------------------------------------------------------------------------------------------------|
| Exact date and time of TC                                     | <p><i>"An important element in the use of TC by people with reduced visual perception or who are blind is the timeliness of the scheduled advice (the registrar arranges for the patient to call at 2 p.m., the patient and his assistant wait for the phone call, and the doctor contacts at 5 p.m., when the assistant is no longer there, or the patient is busy with other activities and cannot use the aids he has prepared - notebook, dictaphone, etc.)."</i></p> <p><i>"That the TC takes place at a fixed time (or at an approximate time) - so I can take care of privacy and better prepare for the conversation (to write down my questions and doctor's recommendations)."</i></p> |
| Long-enough time for the visit                                | <p><i>"Adequate time because it can sometimes be difficult to read the results on my own and the stress of rushing doesn't make it easier."</i></p> <p><i>"Sometimes a little more time is needed, e.g. to write something down, it is important that the TC does not put too much time pressure."</i></p> <p><i>"Above all, the doctor's attitude, understanding that a little more time is needed to handle the technology."</i></p>                                                                                                                                                                                                                                                           |
| Psychosocial competencies of the staff                        | <p><i>"To simply be treated as a subject and not as an object."</i></p>                                                                                                                                                                                                                                                                                                                                                                                                                                                                                                                                                                                                                          |
| Medical staff competencies related to the functioning of PwDs | <p><i>"That the doctor should be aware that he is talking to a blind person and be able to give him comprehensive information."</i></p> <p><i>"Knowledge of the subject of disability, often doctors are surprised that a blind person lives independently, etc."</i></p>                                                                                                                                                                                                                                                                                                                                                                                                                        |
| Well-designed TC                                              | <p><i>"Their availability, at least the phone option."</i></p> <p><i>"Short wait times for TC."</i></p> <p><i>"For the doctor to receive my test results prior to TC and review them before calling me, so that I don't have to walk to pick up the results and then read them to the doctor during the TC."</i></p> <p><i>"So the doctor calls (not the patient)."</i></p>                                                                                                                                                                                                                                                                                                                      |
| Awareness of the patient's health situation                   | <p><i>"Teleconsultation to a doctor who knows my medical history."</i></p>                                                                                                                                                                                                                                                                                                                                                                                                                                                                                                                                                                                                                       |
| Technological issues                                          | <p><i>"Openness of doctors to issue e-prescriptions and e-referrals, which a blind person can read independently."</i></p> <p><i>"That the TC would be available to everyone, i.e. it would not be via some platform that I cannot handle."</i></p> <p><i>"It would be good if e-prescriptions were introduced everywhere; it often happens that even though I use the TC, I still have to go in person to the clinic and collect the prescription. It would be much easier if codes for e-prescriptions were sent by text message or e-mail."</i></p>                                                                                                                                           |
